# Supplementary material
Source: publisher site journal article supplement (https://www.dovepress.com/article/336028)
Supplement: Supplementary file 1 [file get_supplementary_file.php]

**
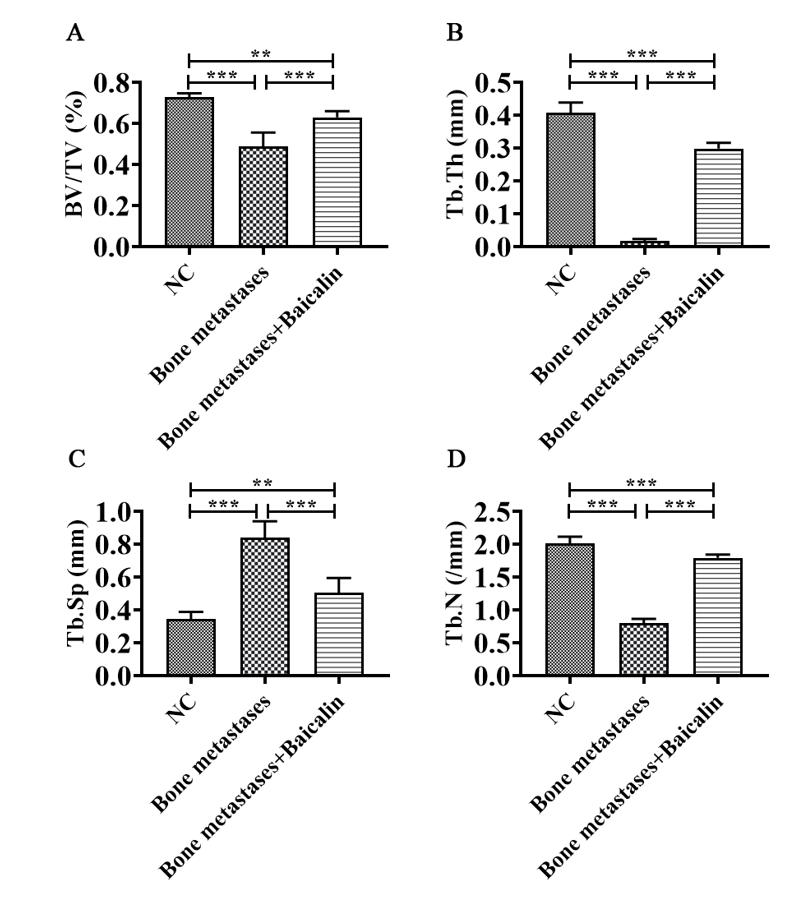
**

**Supplementary Figure 1** CT was used to examine the bone volume fraction (BV/TV), trabecular thickness (Tb.Th), the number of trabeculae (Tb.N) and the mean spacing of trabecular bone (Tb.Sp) in the NC group, the Bone metastases group and the Bone metastases + Baicalin group. Compared with the control group, BV/TV, Tb.Th and Tb.N were downregulated in the Bone metastases group. Although the trend of Tb.Sp was opposite, BV/TV, Tb.Th and Tb.N were significantly increased after baicalin treatment. Data were shown as mean ± SD. ***p*﹤0.01, ****p*﹤0.001.

Supplementary Table 1 The primers were used for this study

| Genes | F(5’-3’) | R(5’-3’) |
| --- | --- | --- |
| *ALPP* | GTGAACCGCAACTGGTACTC | GAGCTGCGTAGCGATGTCC |
| *DUSP1* | AGTACCCCACTCTACGATCAGG | GAAGCGTGATACGCACTGC |
| *CYR61* | CTCGCCTTAGTCGTCACCC | CGCCGAAGTTGCATTCCAG |
| *ALPPL2* | CCCGCTTTAACCAGTGCAAC | CCCACGTCACCTCGTTTCTT |
| *SPP1* | CTCCATTGACTCGAACGACTC | CAGGTCTGCGAAACTTCTTAGAT |
| *GAPDH* | AGCTTCGGCACATATTTCATCTG | CGTTCACTCCCATGACAAACA |
